# Supplementary material
Source: publisher site journal article supplement (https://static.cambridge.org/content/id/urn:cambridge.org:id:article:S1754470X20000276/resource/name/S1754470X20000276supp001.zip)
Supplement: Supplementary file 1 [file S1754470X20000276supp001.zip]

Archive with 6 entries (6 files):
- S1754470X20000276supp001.pdf
- S1754470X20000276supp002.pdf
- S1754470X20000276supp003.docx
- S1754470X20000276supp004.docx
- S1754470X20000276supp005.docx
- S1754470X20000276supp006.pdf
