# Supplementary material
Source: publisher site journal article supplement (https://static.cambridge.org/content/id/urn:cambridge.org:id:article:S1754470X20000276/resource/name/S1754470X20000276supp001.zip)
Supplement: Supplementary file 1 [file S1754470X20000276supp001.zip › S1754470X20000276supp002.pdf]

**Appendix C: Summary sheet of therapeutic context**

|                                                                                                                                                                                                               |  |
|---------------------------------------------------------------------------------------------------------------------------------------------------------------------------------------------------------------|--|
| <b>Ages</b>                                                                                                                                                                                                   |  |
| <b>Genders</b>                                                                                                                                                                                                |  |
| <b>Presenting Problems</b>                                                                                                                                                                                    |  |
| <b>Number of sessions</b><br><b>Was the end planned / unplanned?</b>                                                                                                                                          |  |
| <b>Assessment</b> (briefly summarise)<br><b>Standardized measures used</b><br><b>Report scores of CSI long form</b><br><b>and all minimum data set</b><br><b>scores for both partners at</b><br><b>intake</b> |  |
| <b>Formulation</b> (attach formulation diagrams or descriptive/narrative summaries that have been used in therapy to the Log Book. Make sure you remove any identifying information)                          |  |
| <b>Intervention</b> (outline specific BCT interventions that were used)                                                                                                                                       |  |
| <b>Outcome</b> (include an excel spread sheet of session by session progress scores including CSI, PHQ-9 and GAD-7)                                                                                           |  |
| <b>Critical Review</b> (Reflect briefly on what you learned through your work and supervision on this case)                                                                                                   |  |
