# Supplementary material
Source: publisher site journal article supplement (https://static.cambridge.org/content/id/urn:cambridge.org:id:article:S1754470X20000276/resource/name/S1754470X20000276supp001.zip)
Supplement: Supplementary file 1 [file S1754470X20000276supp001.zip › S1754470X20000276supp003.docx]

**Appendix A: Behavioural Couple Therapy Scale - Depression**
